# Supplementary material for: Blimp-1 is a prognostic indicator for progression of cervical intraepithelial neoplasia grade 2
Source: PubMed Central journal article supplement (PMC9294030; doi:10.1007/s00432-022-03993-4), 2022-04-06
Supplement: 432_2022_3993_MOESM2_ESM.pdf [file 432_2022_3993_MOESM2_ESM.pdf]

**Table S2.** List of panel specific details

|                   | PAb-1    | Dilution | HIER*                      | 2 <sup>o</sup> Ab-1 | Dilution | Fab | Dilution | PAb-2           | Dilution | 2 <sup>o</sup> Ab-2 | Dilution |
|-------------------|----------|----------|----------------------------|---------------------|----------|-----|----------|-----------------|----------|---------------------|----------|
| <b>Panel I</b>    | FoxP3    | 1:100    | Tris-Urea<br>(pH 9.5)      | AF488               | 1:200    | Fab | 1:25     | Blimp1          | 1:100    | AF555               | 1:200    |
|                   |          |          |                            |                     |          |     |          | CD4             | 1:100    | AF647               | 1:200    |
| <b>Panel II-1</b> | Tbet     | 1:50     | Sodium Citrate<br>(pH 6.0) | AF488               | 1:200    |     |          |                 |          |                     |          |
|                   | GATA3    | 1:50     |                            | AF555               | 1:200    |     |          |                 |          |                     |          |
| <b>Panel II-2</b> | IL-17    | 1:50     | Sodium Citrate<br>(pH 6.0) | AF488               | 1:200    |     |          |                 |          |                     |          |
| <b>Panel III</b>  | CD8      | 1:50     | Tris-Urea<br>(pH 9.5)      | AF555               | 1:200    |     |          |                 |          |                     |          |
|                   | Granzyme | 1:100    |                            | AF488               | 1:200    |     |          |                 |          |                     |          |
| <b>Panel IV</b>   | Langerin | 1:100    | Tris-Urea<br>(pH 9.5)      | AF488               | 1:200    | Fab | 1:25     | Fascin          | 1:800    | AF555               | 1:200    |
|                   |          |          |                            |                     |          |     |          | TSLP            | 1:200    | AF647               | 1:200    |
| <b>Panel V</b>    | Clec9A   | 1:50     | Tris-Urea<br>(pH 9.5)      | AF488               | 1:200    |     |          |                 |          |                     |          |
|                   | DC-LAMP  | 1:25     |                            | AF555               | 1:200    |     |          |                 |          |                     |          |
|                   | CD11c    | 1:100    |                            | AF647               | 1:200    |     |          |                 |          |                     |          |
| <b>Panel VI</b>   | HMGB1    | 1:100    | Tris-Urea<br>(pH 9.5)      | AF488               | 1:200    | Fab | 1:25     | CD138           | 1:500    | AF555               | 1:200    |
|                   |          |          |                            |                     |          |     |          | CD32B           | 1:200    | AF647               | 1:200    |
| <b>Panel VII</b>  | IDO1     | 1:100    | Tris-Urea<br>(pH 9.5)      | AF488               | 1:200    | Fab | 1:25     | pan-specific E4 | 1:300    | AF555               | 1:200    |
|                   |          |          |                            |                     |          |     |          | PD-L1           | 1:100    | AF647               | 1:200    |

\*HIER: Heat-Induced Epitope Retrieval
