# Supplementary material for: Blimp-1 is a prognostic indicator for progression of cervical intraepithelial neoplasia grade 2
Source: PubMed Central journal article supplement (PMC9294030; doi:10.1007/s00432-022-03993-4), 2022-04-06
Supplement: 432_2022_3993_MOESM3_ESM.pdf [file 432_2022_3993_MOESM3_ESM.pdf]

**Table S3.** Expression of PD-L1 and IDO-1 in CIN2 dysplastic cells

|              |          | <b>Persister/Regressor</b> | <b>Progressor (CIN3+)</b> |                     |
|--------------|----------|----------------------------|---------------------------|---------------------|
|              |          | <b>(n=34)</b>              | <b>(n=34)</b>             | Fisher's exact test |
| <b>PD-L1</b> | Positive | 6 (17.6 %)                 | 6 (17.6 %)                | <i>P</i> > 0.9999   |
|              | Negative | 28 (82.4 %)                | 28 (82.4 %)               |                     |
| <b>IDO-1</b> | Positive | 5 (15.2 %)                 | 11 (32.4 %)               | <i>P</i> = 0.1517   |
|              | Negative | 28 (84.8 %)                | 23 (67.6 %)               |                     |
