# Supplementary material for: Blimp-1 is a prognostic indicator for progression of cervical intraepithelial neoplasia grade 2
Source: PubMed Central journal article supplement (PMC9294030; doi:10.1007/s00432-022-03993-4), 2022-04-06
Supplement: 432_2022_3993_MOESM5_ESM.pdf [file 432_2022_3993_MOESM5_ESM.pdf]

(A)

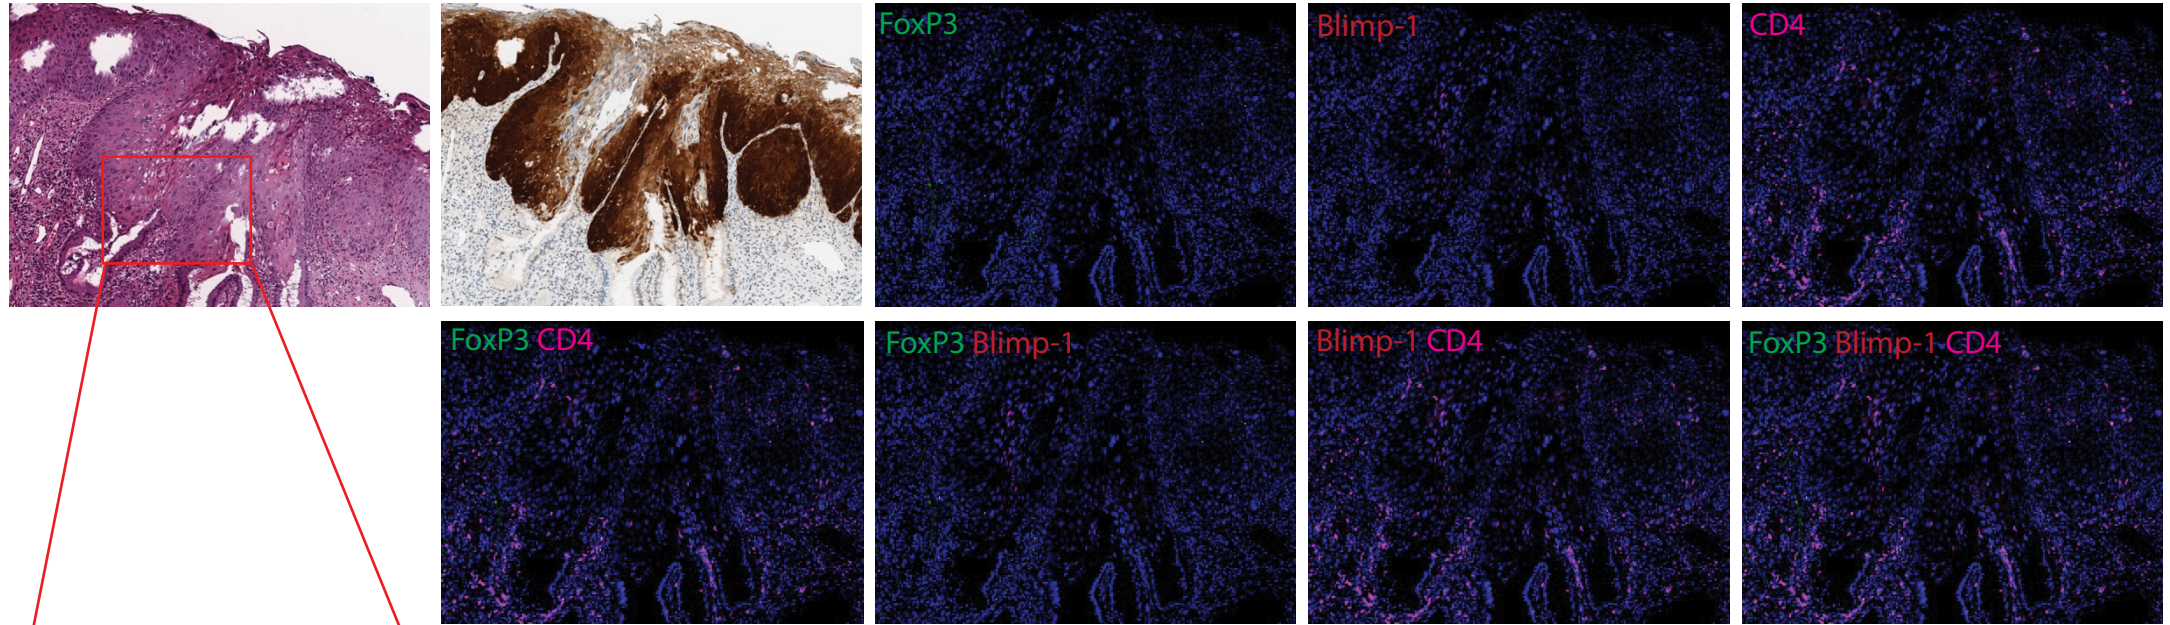

(B)

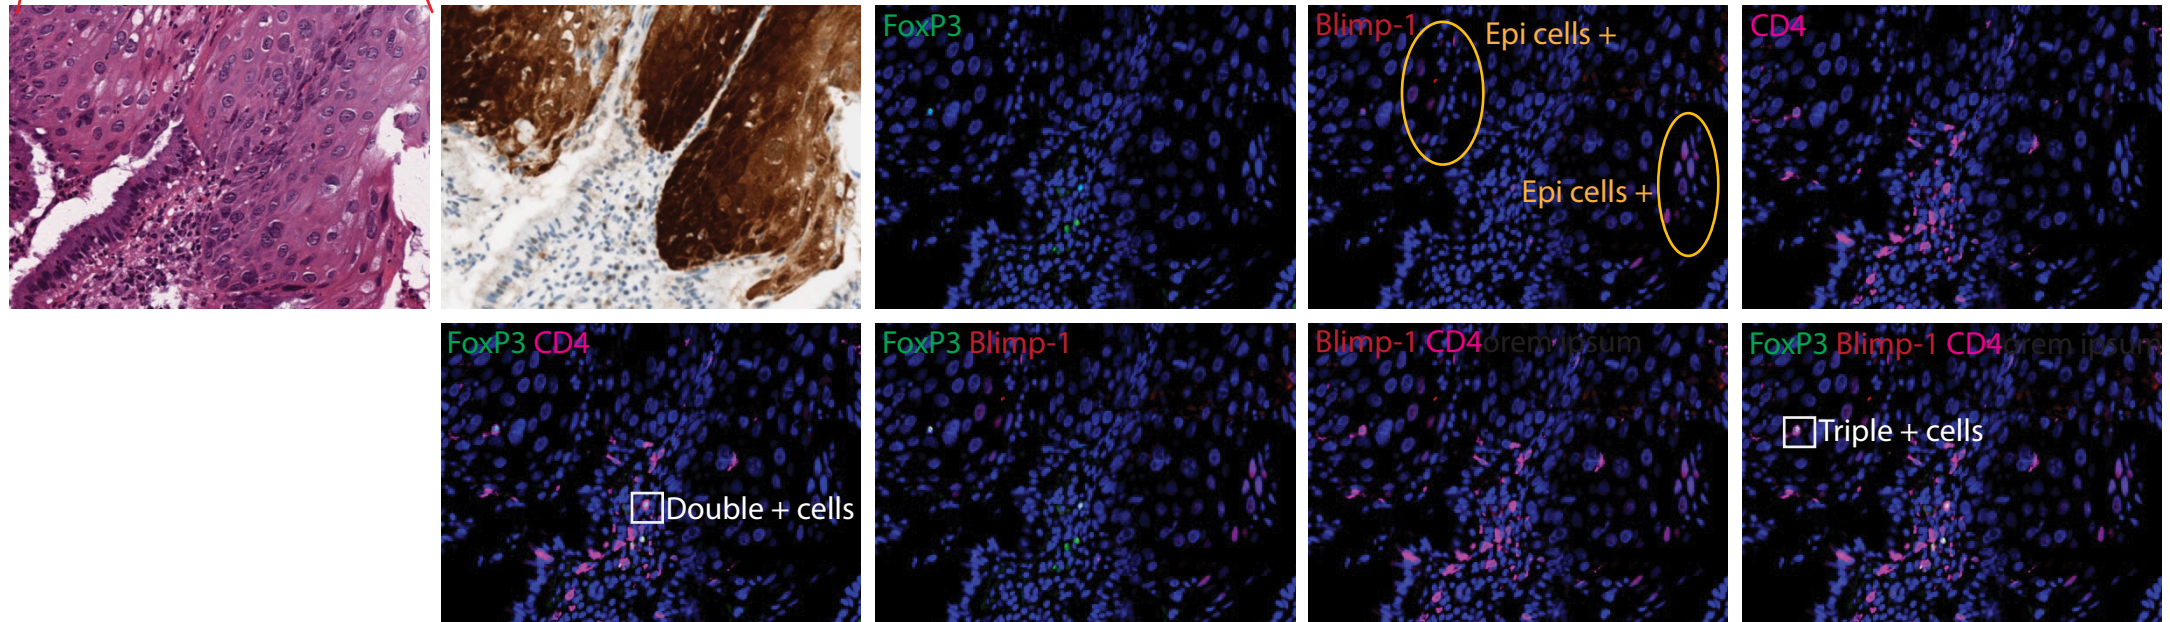

Figure S2: An example image (A) and a close up (B) is shown of the FoxP3, Blimp-1 and CD4 staining panel. Examples of single, double and triple stained cells are shown.
