# Supplementary material for: Blimp-1 is a prognostic indicator for progression of cervical intraepithelial neoplasia grade 2
Source: Springer Nature journal article supplement (doi:10.1007/s00432-022-03993-4), 2022-04-06
Supplement: MOESM1 [file 20289972]

**Table S1.** List of antibodies

|                     | <b>Ab-1</b>             | <b>Source</b>            | <b>Catalogue no.</b> | <b>Clonality</b>  | <b>Clone</b> | <b>Dilution</b> |
|---------------------|-------------------------|--------------------------|----------------------|-------------------|--------------|-----------------|
| <b>Panel I</b>      | FoxP3                   | abcam                    | ab20034              | Mouse monoclonal  | 236AE7       | 1:100           |
|                     | Blimp1                  | NOVUS                    | NB600-235            | Mouse monoclonal  | 3H2E8        | 1:100           |
|                     | CD4                     | abcam                    | ab133616             | Rabbit monoclonal | EPR6855      | 1:100           |
| <b>Panel II-1</b>   | Tbet                    | Cell Signaling           | CTE13232S            | Rabbit monoclonal | D6N8B        | 1:50            |
|                     | GATA3                   | Cell Marque              | CM390M14             | Mouse monoclonal  | L50-823      | 1:50            |
| <b>Panel II-2</b>   | IL-17                   | abcam                    | ab79056              | Rabbit polyclonal | -            | 1:50            |
| <b>Panel III</b>    | CD8                     | abcam                    | ab17147              | Mouse monoclonal  | 144B         | 1:50            |
|                     | Granzyme                | abcam                    | ab208586             | Rabbit monoclonal | EPR20129-217 | 1:100           |
| <b>Panel IV</b>     | Langerin                | abcam                    | ab49730              | Mouse monoclonal  | 12D6         | 1:100           |
|                     | Fascin                  | abcam                    | ab78487              | Mouse monoclonal  | 55K2         | 1:800           |
|                     | TSLP                    | Merck Millipore          | ABT330               | Rabbit polyclonal | -            | 1:200           |
| <b>Panel V</b>      | Clec9A                  | R&D Systems              | AF6049               | Sheep polyclonal  | -            | 1:50            |
|                     | DC-LAMP                 | Beckman Coulter          | IM3448               | Mouse monoclonal  | 104G4        | 1:25            |
|                     | CD11c                   | abcam                    | ab52632              | Rabbit monoclonal | EP1347Y      | 1:100           |
| <b>Panel VI</b>     | HMGB1                   | abcam                    | ab79823              | Rabbit monoclonal | EPR3507      | 1:100           |
|                     | CD138                   | abcam                    | ab34164              | Mouse monoclonal  | B-A38        | 1:500           |
|                     | CD32B                   | abcam                    | ab45143              | Rabbit monoclonal | EP888Y       | 1:200           |
| <b>Panel VII</b>    | IDO1                    | Merck Millipore          | MAB5412              | Mouse monoclonal  | 10.1         | 1:100           |
|                     | pan-specific E4*        | a gift from John Doorbar |                      | Mouse monoclonal  | FH1.1        | 1:300           |
|                     | PD-L1(R)                | Biocare Medical          | ACI 3171 A           | Rabbit monoclonal | CAL10        | 1:100           |
| <b>2°C Ab</b>       | AF488 anti-Mouse IgG    | Thermo Fisher Scientific | A11029               | Goat polyclonal   | -            | 1:200           |
|                     | AF488 anti-Rabbit IgG   | Thermo Fisher Scientific | A11070               | Goat polyclonal   | -            | 1:200           |
|                     | AF488 anti-Sheep IgG    | Thermo Fisher Scientific | 713-545-147          | Donkey polyclonal | -            | 1:200           |
|                     | AF555 anti-Mouse IgG    | abcam                    | ab150118             | Goat polyclonal   | -            | 1:200           |
|                     | AF647 anti-Rabbit IgG   | Thermo Fisher Scientific | A21245               | Goat polyclonal   | -            | 1:200           |
| <b>Fab Fragment</b> | Donkey Anti-Mouse IgG   | Jackson ImmunoResearch   | 715-007-003          | Donkey polyclonal | -            | 1:25            |
|                     | Donkey Anti- Rabbit IgG | Jackson ImmunoResearch   | 711-007-003          | Donkey polyclonal | -            | 1:25            |

\*Reactive against the high-risk HPV types 16, 18, 31, 33, 35, 39, 45, 51, 52, 53, 56, 58, 59, 66, 67, and 70
